# Supplementary material for: Babela massiliensis, a representative of a widespread bacterial phylum with unusual adaptations to parasitism in amoebae
Source: PubMed Central journal article supplement (PMC4378268; doi:10.1186/s13062-015-0043-z), 2015-03-31

**A**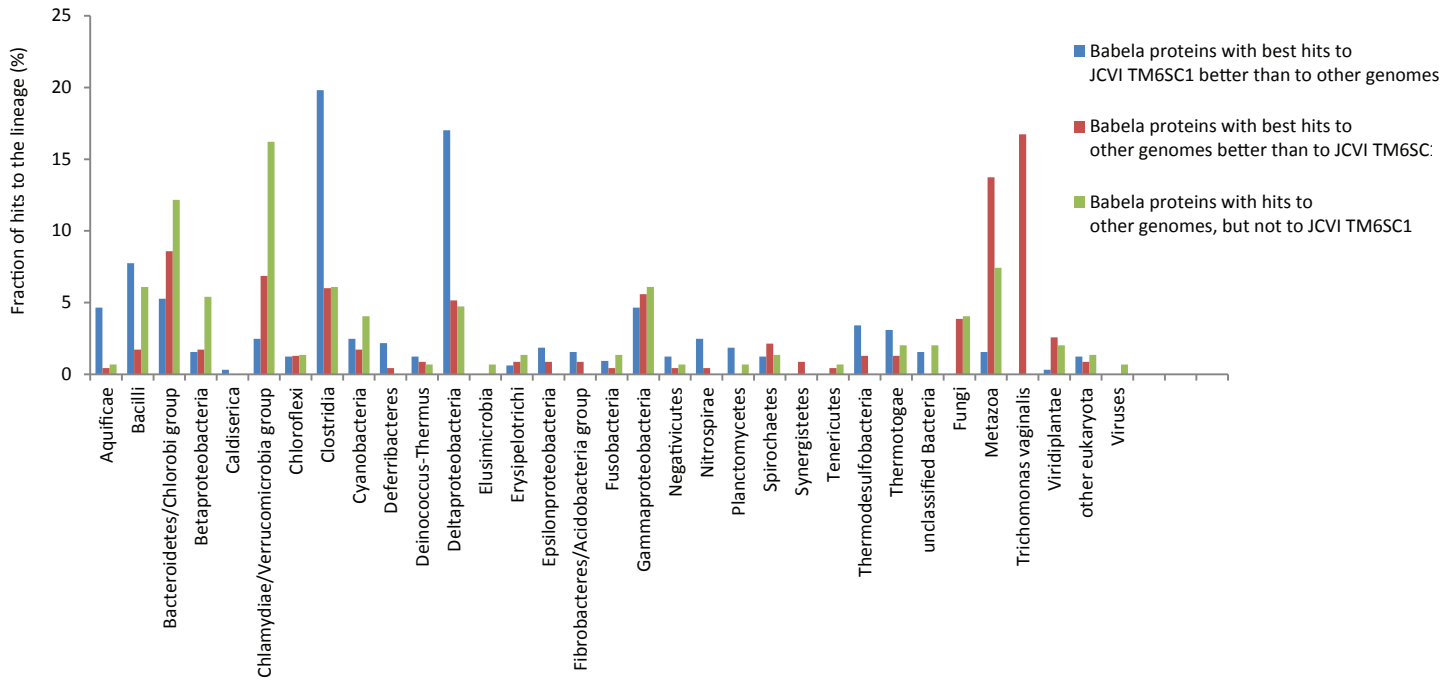**B**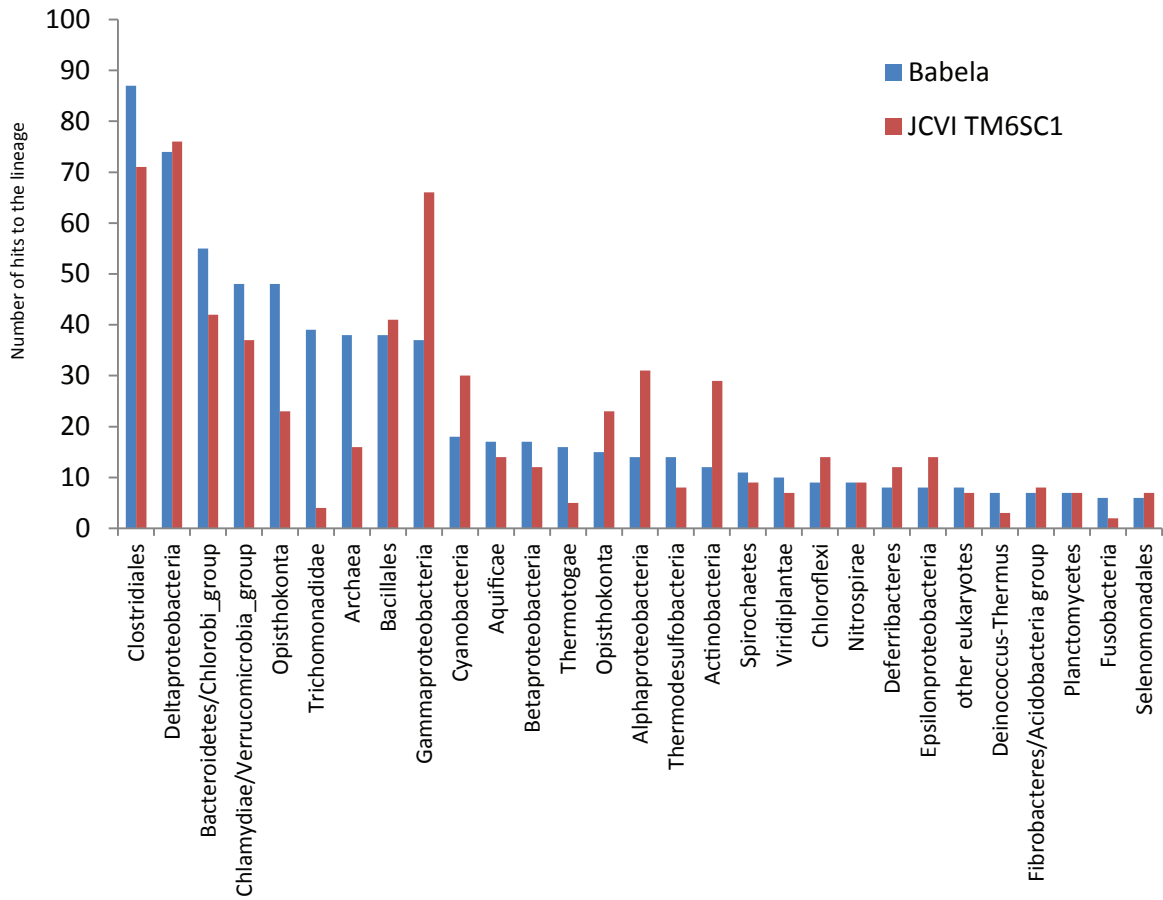

Supplement: 13062_2015_43_MOESM5_ESM.pdf [file 13062_2015_43_MOESM5_ESM.pdf]
