# Supplementary material for: Babela massiliensis, a representative of a widespread bacterial phylum with unusual adaptations to parasitism in amoebae
Source: PubMed Central journal article supplement (PMC4378268; doi:10.1186/s13062-015-0043-z), 2015-03-31
Supplement: 13062_2015_43_MOESM8_ESM.pdf [file 13062_2015_43_MOESM8_ESM.pdf]

A

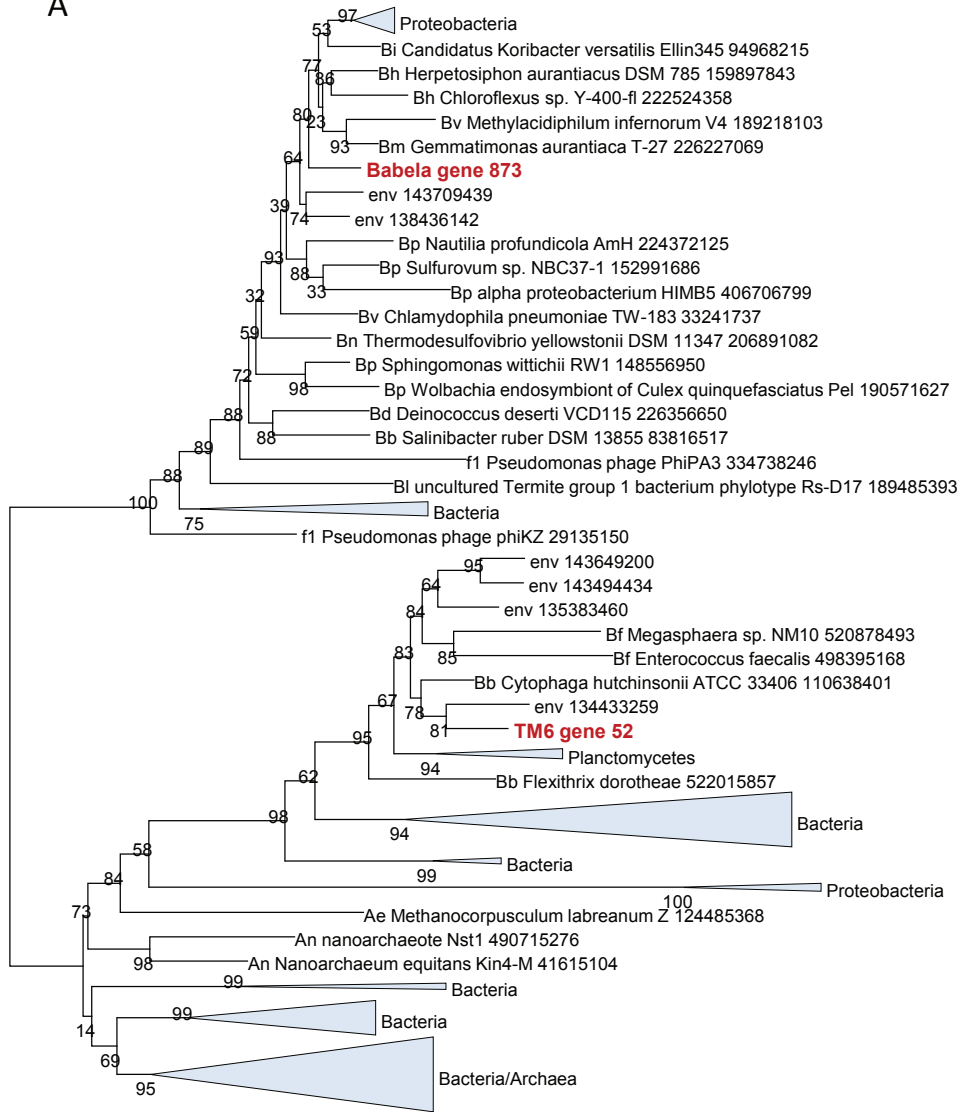

0.2

**taxa abbreviations:**

|                                  |                                      |
|----------------------------------|--------------------------------------|
| Ae, Euryarchaeota                | Bi, Acidobacteria                    |
| An, Nanoarchaeota                | Bl, Elusimicrobia                    |
| Bb, Bacteroidetes/Chlorobi group | Bm, Gemmatimonadetes                 |
| Bd, Deinococcus-Thermus          | Bn, Nitrospirae                      |
| Bf, Firmicutes                   | Bp, Proteobacteria                   |
| Bh, Chloroflexi                  | Bv, Chlamydiae/Verrucomicrobia group |
|                                  | f1, phages                           |

B

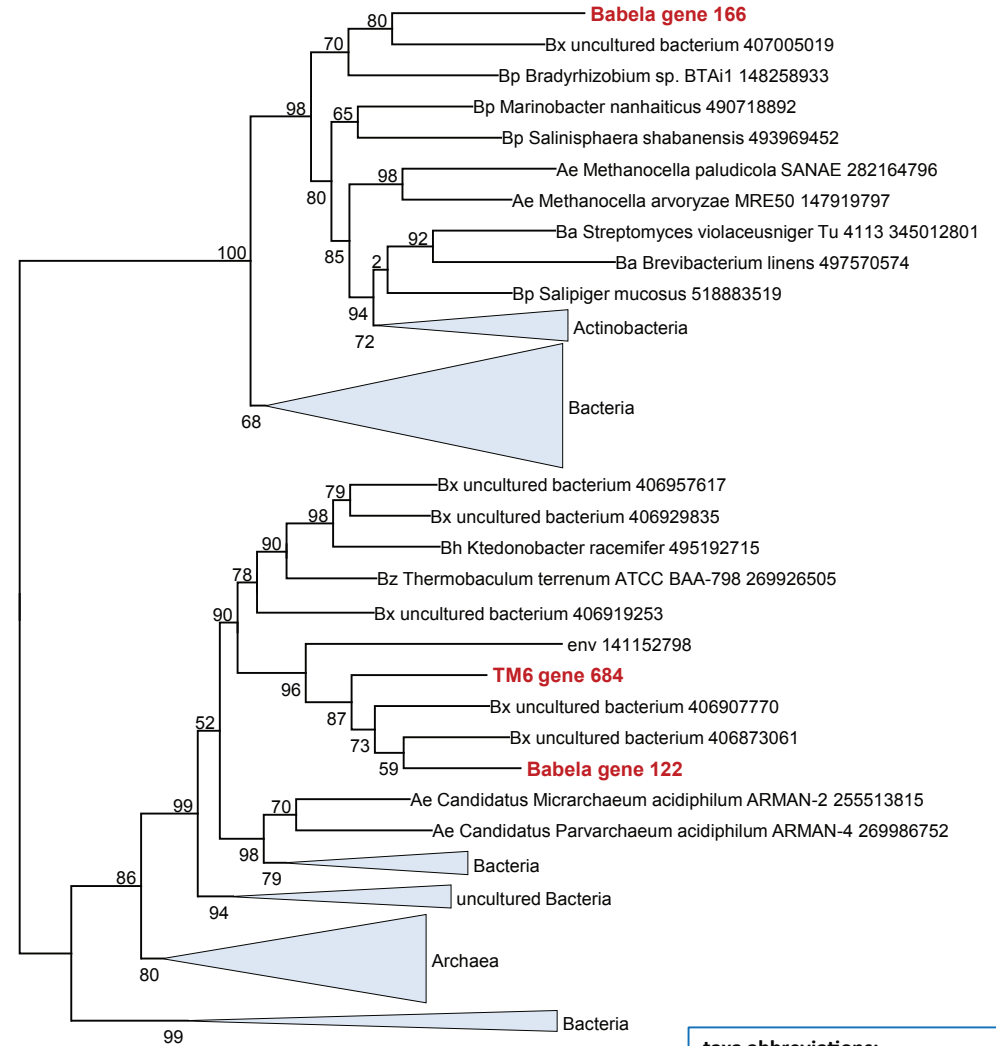

0.2

**taxa abbreviations:**

|                           |
|---------------------------|
| Ae, Euryarchaeota         |
| Ba, Actinobacteria        |
| Bh, Chloroflexi           |
| Bp, Proteobacteria        |
| Bx, environmental samples |
| Bz, unclassified Bacteria |
