# Supplementary material for: Babela massiliensis, a representative of a widespread bacterial phylum with unusual adaptations to parasitism in amoebae
Source: PubMed Central journal article supplement (PMC4378268; doi:10.1186/s13062-015-0043-z), 2015-03-31
Supplement: 13062_2015_43_MOESM13_ESM.pdf [file 13062_2015_43_MOESM13_ESM.pdf]

A

Babela\_gene\_124
Babela\_gene\_300
Babela\_gene\_562
Babela\_gene\_16
Babela\_gene\_252
Babela\_gene\_417
Babela\_gene\_217
Babela\_gene\_104
Babela\_gene\_102
OrigSeq
Jnet

Hhpred based alignment of the most conserved blocks and catalytically relevant amino acids

Q ss\_pred
Q Babela\_gene\_25
Q Consensus
T Consensus
T PLN03189
T ss\_pred

Ulp1 protease family

YPL020C
Atg906910
7296280
SPECL97.09
KCG09769
Hs765750

Continued

Babela\_gene\_124
Babela\_gene\_300
Babela\_gene\_562
Babela\_gene\_16
Babela\_gene\_252
Babela\_gene\_417
Babela\_gene\_217
Babela\_gene\_104
Babela\_gene\_102
OrigSeq
Jnet

Hhpred based alignment of the most conserved blocks and catalytically relevant amino acids

Q ss\_pred
Q Babela\_gene\_25
Q Consensus
T Consensus
T PLN03189
T ss\_pred

Ulp1 protease family

YPL020C
Atg906910
7296280
SPECL97.09
KCG09769
Hs765750

Hhpred output for Babela\_gene\_300

Table with 6 columns: No Hit, Prob E-value, P-value, Aa, Co, SS Cols, Query HMM, Template HMM. Rows include PLN03189, COG5160, PF02902, and PF02902 Peptidase\_C48.

>PLN03189 Protease specific for SMALL UBIQUITIN-RELATED MODIFIER (SUMO): Provisional

Probab=91.18 E-value=2.1 Score=45.40 Aligned\_cols=113 Identities=20% Similarity=0.317 Sum\_probs=0.0

Q ss\_pred
Q Babela\_gene\_25
Q Consensus
T Consensus
T PLN03189
T ss\_pred

>PF02902 Peptidase\_C48: Ulp1 protease family, C-terminal catalytic domain

Probab=89.42 E-value=5.6 Score=34.25 Aligned\_cols=102 Identities=19% Similarity=0.289 Sum\_probs=0.0

Q ss\_pred
Q Babela\_gene\_25
Q Consensus
T Consensus
T PF02902 consen
T ss\_dssp
T PLN03189
T ss\_pred

>COG5160 Ulp1 Protease, Ulp1 family [Posttranslational modification, protein turnover, chaperones]

Probab=90.24 E-value=1.1 Score=47.95 Aligned\_cols=99 Identities=24% Similarity=0.496 Sum\_probs=0.0

Q ss\_pred
Q Babela\_gene\_25
Q Consensus
T Consensus
T COG5160
T ss\_pred

>PF02902 Peptidase\_C48: Ulp1 protease family, C-terminal catalytic domain This family belongs to family C48 of the peptidase classification.; InterPro: In the MEROPS database peptidases

Probab=75.06 E-value=2.1 Score=36.88 Aligned\_cols=34 Identities=24% Similarity=0.304 Sum\_probs=0.0

Q ss\_pred
Q Babela\_gene\_25
Q Consensus
T Consensus
T PF02902 consen
T ss\_dssp
T PLN03189
T ss\_pred

B
